# Supplementary material
Source: Elsevier journal article supplement (http://giordanostefano.it/file/articoli/mmc1.pdf)

Supplemental Material Section of the manuscript:

# Analytical procedure for determining the linear and nonlinear effective properties of the elastic composite cylinder

Stefano Giordano

*Joint International Laboratory LICs/LEMAC,  
Institute of Electronics, Microelectronic and Nanotechnology  
(UMR CNRS 8520)*

*PRES University North of France, ECLille,  
Avenue Poincaré, BP 60069, 59652, Villeneuve d'Ascq, France*

In this Supplemental Material Section we present a Maple<sup>TM</sup> code able to determine the linear and nonlinear effective elastic moduli of a nonlinearly elastic composite cylinder. The code is based on the solutions given in Eqs.(47)-(50) of the main text where the coefficients have been renamed as follows for simplicity:  $d_{-3}=\mathbf{M}$ ,  $d_{-1}=\mathbf{H}$ ,  $d_1=\mathbf{G}$ ,  $c_{-1}=\mathbf{F}$ ,  $c_1=\mathbf{N}$ ,  $c_3=\mathbf{Q}$ ,  $b_1=\mathbf{B}$ ,  $a_1=\mathbf{A}$  and  $a_3=\mathbf{W}$ . By using the Kolossov-Muskhelishvili equations (see Eq.(25) of the main text) we have successively determined the distribution of displacement within the heterogeneous structure (variables  $ux1$ ,  $uy1$ ,  $ux2$ ,  $uy2$  in the code). Therefore, we have straightforwardly calculated the strain components in the two phases (variables  $exx1$ ,  $eyy1$ ,  $exy1$ ,  $exx2$ ,  $eyy2$ ,  $exy2$  in the code). In the following part of the code the terms appearing in Eqs.(66) and (67) have been implemented and all the integrals have been calculated analytically by means of the standard use of the cylindrical coordinates (see Table I for the names of variables in the Maple code). Finally, the linear  $mueff$ ,  $keff$  and nonlinear  $feff$ ,  $eeff$  effective elastic moduli have been implemented through Eqs.(68)-(71). The results are exact for any volume fraction  $p$  (over the range 0..1) of the core (inhomogeneity of radius  $R$ ) in the external shell (matrix of radius  $Rt$ ). To conclude, we remark that the code could be also used for verifying the second order expansions given in Eqs.(72)-(75), valid for nonlinear tubes or nanotubes and the first order expansion given in Eqs.(88)-(89) with all the coefficients reported in Appendix A.

Table I: Integrals appearing in Eqs.(66) and (67) and corresponding names in The maple code. The complete expression of each integral can be found within the code.

| Integrals                                                                                              | Variable name       |
|--------------------------------------------------------------------------------------------------------|---------------------|
| $\int_{\Omega_1} \{ \text{Tr}[\hat{\epsilon}^L(\vec{x})] \}^2 d\vec{x}$                                | <b>intetrel1</b>    |
| $\int_{\Omega_2} \{ \text{Tr}[\hat{\epsilon}^L(\vec{x})] \}^2 d\vec{x}$                                | <b>intetre2</b>     |
| $\int_{\Omega_1} \text{Det}[\hat{\epsilon}^L(\vec{x})] d\vec{x}$                                       | <b>intedetel1</b>   |
| $\int_{\Omega_2} \text{Det}[\hat{\epsilon}^L(\vec{x})] d\vec{x}$                                       | <b>intedete2</b>    |
| $\int_{\Omega_1} \text{Tr}^3 [\hat{\epsilon}^L(\vec{x})] d\vec{x}$                                     | <b>intetrelcubo</b> |
| $\int_{\Omega_2} \text{Tr}^3 [\hat{\epsilon}^L(\vec{x})] d\vec{x}$                                     | <b>intetre2cubo</b> |
| $\int_{\Omega_1} \text{Tr} [\hat{\epsilon}^L(\vec{x})] \text{Det}[\hat{\epsilon}^L(\vec{x})] d\vec{x}$ | <b>intetrdet1</b>   |
| $\int_{\Omega_2} \text{Tr} [\hat{\epsilon}^L(\vec{x})] \text{Det}[\hat{\epsilon}^L(\vec{x})] d\vec{x}$ | <b>intetrdet2</b>   |

```

> chi1:=1+2*mu1/k1;chi2:=1+2*mu2/k2;

$$\chi_1 := 1 + \frac{2\mu_1}{k_1}$$


$$\chi_2 := 1 + \frac{2\mu_2}{k_2}$$

> phi1:=N*z+F/z+Q*z^3;

$$\phi_1 := Nz + \frac{F}{z} + Qz^3$$

> psi1:=G*z+H/z+M/z^3;

$$\psi_1 := Gz + \frac{H}{z} + \frac{M}{z^3}$$

> N:=Nr:F:=Fr+I*Fi:G:=Gr+I*Gi:H:=Hr:Q:=Qr+I*Qi:M:=Mr+I*Mi:
> phi2:=A*z+W*z^3;
> psi2:=B*z;

$$\phi_2 := Az + Wz^3$$


$$\psi_2 := Bz$$

> B:=Br+I*Bi:A:=Ar:W:=Wr+I*Wi:
> phi11:=diff(phi1,z):
> phi12:=diff(phi11,z):
> phi21:=diff(phi2,z):
> phi22:=diff(phi21,z):
> psi11:=diff(psi1,z):
> psi21:=diff(psi2,z):
> z:=x+I*y;
>

$$z := x + yI$$

>
> dep1:=((1/2/mu1)*(chi1*phi1-z*conjugate(phi11)-conjugate(psi1)))
:
> dep2:=((1/2/mu2)*(chi2*phi2-z*conjugate(phi21)-conjugate(psi2)))
:
> ux1:=Re(dep1) assuming
(x, real, y, real, mu1, real, mu2, real, k1, real, k2, real, Nr, real, Fr, real
, Fi, real, Gr, real, Gi, real, Hr, real, Qr, real, Qi, real, Mr, real, Mi, real
, Br, real, Bi, real, Ar, real, Wr, real, Wi, real) :
> uy1:=Im(dep1) assuming
(x, real, y, real, mu1, real, mu2, real, k1, real, k2, real, Nr, real, Fr, real
, Fi, real, Gr, real, Gi, real, Hr, real, Qr, real, Qi, real, Mr, real, Mi, real
, Br, real, Bi, real, Ar, real, Wr, real, Wi, real) :
> ux2:=Re(dep2) assuming
(x, real, y, real, mu1, real, mu2, real, k1, real, k2, real, Nr, real, Fr, real
, Fi, real, Gr, real, Gi, real, Hr, real, Qr, real, Qi, real, Mr, real, Mi, real
, Br, real, Bi, real, Ar, real, Wr, real, Wi, real) :
> uy2:=Im(dep2) assuming

```

(**x, real, y, real, mu1, real, mu2, real, k1, real, k2, real, Nr, real, Fr, real, Fi, real, Gr, real, Gi, real, Hr, real, Qr, real, Qi, real, Mr, real, Mi, real, Br, real, Bi, real, Ar, real, Wr, real, Wi, real**) :

> **exx1:=simplify(diff(ux1,x));**

$$\begin{aligned} \text{exx1} := & - (8 \mu_1 Fi y^3 x^3 + 4 \mu_1 Fi y^5 x - 12 \mu_1 Qr x^6 y^4 + 12 \mu_1 Qr x^4 y^6 + 18 \mu_1 Qr x^2 y^8 \\ & - Hr x^4 kl y^2 + Hr x^2 kl y^4 + 4 Gr x^6 kl y^2 + 6 Gr x^4 kl y^4 + 18 kl Mr y^2 x^2 - 12 kl Mi y x^3 \\ & + 12 kl Mi y^3 x - 10 kl Fr y^4 x^2 + 8 kl Fi y x^5 - 8 kl Fi y^5 x + 12 \mu_1 Qi x^9 y + 48 \mu_1 Qi x^7 y^3 \\ & + 72 \mu_1 Qi x^5 y^5 + 48 \mu_1 Qi x^3 y^7 + 4 Gr x^2 kl y^6 - 8 \mu_1 Nr x^6 y^2 - 12 \mu_1 Nr x^4 y^4 \\ & - 8 \mu_1 Nr x^2 y^6 + 2 \mu_1 Fr x^4 y^2 - 2 \mu_1 Fr x^2 y^4 + 4 \mu_1 Fi y x^5 + 30 kl Qr x^8 y^2 + 60 kl Qr x^6 y^4 \\ & + 60 kl Qr x^4 y^6 + 30 kl Qr x^2 y^8 - 18 \mu_1 Qr x^8 y^2 - 10 kl Fr x^4 y^2 + 12 x \mu_1 Qi y^9 \\ & + 6 \mu_1 Qr y^{10} + Hr kl y^6 - 3 kl Mr y^4 + 2 kl Fr y^6 + Gr kl y^8 - 2 \mu_1 Nr y^8 - 2 \mu_1 Fr y^6 \\ & + 6 kl Qr y^{10} - 3 kl Mr x^4 - Hr x^6 kl + Gr x^8 kl + 2 \mu_1 Fr x^6 - 6 \mu_1 Qr x^{10} + 6 kl Qr x^{10} \\ & - 2 \mu_1 Nr x^8 + 2 kl Fr x^6) / (2 \mu_1 kl (x^2 + y^2)^4) \end{aligned}$$

> **eyy1:=simplify(diff(uy1,y));**

$$\begin{aligned} \text{eyy1} := & (-8 \mu_1 Fi y^3 x^3 - 4 \mu_1 Fi y^5 x + 12 \mu_1 Qr x^6 y^4 - 12 \mu_1 Qr x^4 y^6 - 18 \mu_1 Qr x^2 y^8 \\ & - Hr x^4 kl y^2 + Hr x^2 kl y^4 + 4 Gr x^6 kl y^2 + 6 Gr x^4 kl y^4 + 18 kl Mr y^2 x^2 - 12 kl Mi y x^3 \\ & + 12 kl Mi y^3 x - 10 kl Fr y^4 x^2 + 8 kl Fi y x^5 - 8 kl Fi y^5 x - 12 \mu_1 Qi x^9 y - 48 \mu_1 Qi x^7 y^3 \\ & - 72 \mu_1 Qi x^5 y^5 - 48 \mu_1 Qi x^3 y^7 + 4 Gr x^2 kl y^6 + 8 \mu_1 Nr x^6 y^2 + 12 \mu_1 Nr x^4 y^4 \\ & + 8 \mu_1 Nr x^2 y^6 - 2 \mu_1 Fr x^4 y^2 + 2 \mu_1 Fr x^2 y^4 - 4 \mu_1 Fi y x^5 + 30 kl Qr x^8 y^2 + 60 kl Qr x^6 y^4 \\ & + 60 kl Qr x^4 y^6 + 30 kl Qr x^2 y^8 + 18 \mu_1 Qr x^8 y^2 - 10 kl Fr x^4 y^2 - 12 x \mu_1 Qi y^9 \\ & - 6 \mu_1 Qr y^{10} + Hr kl y^6 - 3 kl Mr y^4 + 2 kl Fr y^6 + Gr kl y^8 + 2 \mu_1 Nr y^8 + 2 \mu_1 Fr y^6 \\ & + 6 kl Qr y^{10} - 3 kl Mr x^4 - Hr x^6 kl + Gr x^8 kl - 2 \mu_1 Fr x^6 + 6 \mu_1 Qr x^{10} + 6 kl Qr x^{10} \\ & + 2 \mu_1 Nr x^8 + 2 kl Fr x^6) / (2 \mu_1 kl (x^2 + y^2)^4) \end{aligned}$$

> **exy1:=simplify((diff(ux1,y)+diff(uy1,x))/2);**

$$\begin{aligned} \text{exy1} := & (6 Qi x^{10} + 2 Fi y^6 + 6 Qi y^{10} + 2 Fi x^6 + Gi y^8 + Gi x^8 - 3 Mi x^4 - 3 Mi y^4 + 18 Mi y^2 x^2 \\ & + 30 Qi y^8 x^2 + 4 Gi y^6 x^2 + 4 Gi y^2 x^6 + 6 Gi y^4 x^4 + 2 Hr x^5 y + 4 Hr x^3 y^3 + 2 Hr x y^5 \\ & + 12 Mr x^3 y - 12 Mr x y^3 + 8 Fr x y^5 - 10 Fi x^4 y^2 - 10 Fi y^4 x^2 + 60 Qi x^4 y^6 + 30 Qi x^8 y^2 \\ & + 60 Qi x^6 y^4 - 8 y Fr x^5) / (2 \mu_1 (x^2 + y^2)^4) \end{aligned}$$

> **exx2:=simplify(diff(ux2,x));**

$$\text{exx2} := \frac{-6 Wr x^2 k2 - 6 Wr y^2 k2 + 2 \mu_2 Ar + 6 \mu_2 Wr x^2 - 6 \mu_2 Wr y^2 - 12 \mu_2 Wi x y - Br k2}{2 \mu_2 k2}$$

> **eyy2:=simplify(diff(uy2,y));**

$$\text{eyy2} := \frac{6 Wr x^2 k2 + 6 Wr y^2 k2 + 2 \mu_2 Ar + 6 \mu_2 Wr x^2 - 6 \mu_2 Wr y^2 - 12 \mu_2 Wi x y + Br k2}{2 \mu_2 k2}$$

> **exy2:=simplify((diff(ux2,y)+diff(uy2,x))/2);**

$$\text{exy2} := \frac{6 Wi y^2 + Bi + 6 Wi x^2}{2 \mu_2}$$

```

> tret1:=factor(simplify(subs(x=rho*cos(theta),y=rho*sin(theta),simplify(exx1+eyy1)))):
> tret2:=factor(simplify(subs(x=rho*cos(theta),y=rho*sin(theta),simplify(exx2+eyy2)))):
> detel:=factor(simplify(subs(x=rho*cos(theta),y=rho*sin(theta),simplify(exx1*eyy1-exy1^2)))):
> dete2:=factor(simplify(subs(x=rho*cos(theta),y=rho*sin(theta),simplify(exx2*eyy2-exy2^2)))):
> intetre2:=factor(simplify(int(int((tret2)^2*rho,theta=0..2*Pi),rho=0..R))) assuming(R>0, Rt>R);

```

$$intetre2 := \frac{2 \pi R^2 (3 R^4 W_r^2 + 3 R^4 W_i^2 + 2 A r^2)}{k^2}$$

```

> intetrel:=factor(simplify(int(int((tret1)^2*rho,theta=0..2*Pi),rho=R..Rt))) assuming(R>0, Rt>R);

```

$$intetrel := 2 \pi (Rt - R) (R + Rt) (3 Rt^6 R^2 Q_r^2 + 3 Rt^6 R^2 Q_i^2 + 3 Rt^4 R^4 Q_r^2 + 3 Rt^4 R^4 Q_i^2 + 6 Rt^2 R^2 Fi Qi - 6 Rt^2 R^2 Q_r Fr + 2 Rt^2 R^2 Nr^2 + 3 Rt^2 R^6 Q_r^2 + 3 Rt^2 R^6 Q_i^2 + Fr^2 + Fi^2) / (R^2 k l^2 Rt^2)$$

```

> intedete2:=factor(simplify(int(int(dete2*rho,theta=0..2*Pi),rho=0..R))) ;

```

$$intedete2 := \pi R^2 (6 R^4 \mu^2 W_r^2 - 12 R^4 W_r^2 k^2 + 6 R^4 \mu^2 W_i^2 - 12 R^4 k^2 W_i^2 - 6 k^2 R^2 W_r B_r - 6 k^2 R^2 W_i B_i + 4 \mu^2 A r^2 - B_r^2 k^2 - k^2 B_i^2) / (4 \mu^2 k^2)$$

```

> intedetel:=factor(simplify(int(int(detel*rho,theta=0..2*Pi),rho=R..Rt))) assuming(R>0, Rt>R);

```

$$intedetel := -\pi (Rt - R) (R + Rt) (6 Rt^8 R^6 k l^2 Gr Q_r + 6 Rt^8 R^6 k l^2 Gi Qi + 12 Rt^6 R^6 Fr Q_r \mu^2 - 12 Rt^6 R^6 Fi Qi \mu^2 + 6 Rt^6 R^8 k l^2 Gr Q_r + 6 Rt^6 R^8 k l^2 Gi Qi - 6 Rt^4 k l^2 Fi Mi R^2 - 6 Rt^4 k l^2 Fr Mr R^2 - 6 Rt^2 R^4 k l^2 Fi Mi - 6 Rt^2 R^4 k l^2 Fr Mr + 12 Rt^{10} R^6 Q_r^2 k l^2 + 12 Rt^{10} R^6 Q_i^2 k l^2 - 6 Rt^{10} R^6 Q_r^2 \mu^2 - 6 Rt^{10} R^6 Q_i^2 \mu^2 + 12 Rt^8 R^8 Q_r^2 k l^2 + 12 Rt^8 R^8 Q_i^2 k l^2 - 6 Rt^8 R^8 Q_r^2 \mu^2 - 6 Rt^8 R^8 Q_i^2 \mu^2 + Rt^6 R^6 Gr^2 k l^2 + Rt^6 R^6 Gi^2 k l^2 - 4 Rt^6 R^6 Nr^2 \mu^2 + 12 Rt^6 R^{10} Q_r^2 k l^2 + 12 Rt^6 R^{10} Q_i^2 k l^2 - 6 Rt^6 R^{10} Q_r^2 \mu^2 - 6 Rt^6 R^{10} Q_i^2 \mu^2 + Rt^4 Hr^2 k l^2 R^4 + 4 Rt^4 Fi^2 k l^2 R^4 + 4 Rt^4 Fr^2 k l^2 R^4 - 2 Rt^4 Fi^2 \mu^2 R^4 - 2 Rt^4 Fr^2 \mu^2 R^4 + 3 Rt^2 R^2 Mr^2 k l^2 + 3 Rt^2 R^2 Mi^2 k l^2 + 3 R^4 Mr^2 k l^2 + 3 R^4 Mi^2 k l^2 + 3 Rt^4 Mi^2 k l^2 + 3 Rt^4 Mr^2 k l^2) / (4 R^6 \mu^2 k l^2 Rt^6)$$

```

> intetrelcubo:=factor(simplify(int(int((tret1)^3*rho,theta=0..2*Pi),rho=R..Rt))) assuming(R>0, Rt>R);

```

$$intetrelcubo := 4 Nr \pi (Rt - R) (R + Rt) (9 Rt^6 R^2 Q_r^2 + 9 Rt^6 R^2 Q_i^2 + 9 Rt^4 R^4 Q_r^2 + 9 Rt^4 R^4 Q_i^2 - 18 Rt^2 R^2 Q_r Fr + 2 Rt^2 R^2 Nr^2 + 18 Rt^2 R^2 Fi Qi + 9 Rt^2 R^6 Q_r^2 + 9 Rt^2 R^6 Q_i^2 + 3 Fi^2 + 3 Fr^2) / (R^2 k l^3 Rt^2)$$

```

> intetre2cubo:=factor(simplify(int(int((tret2)^3*rho,theta=0..2*Pi),rho=0..R))) assuming(R>0, Rt>R);

```

$$\text{intetre2cubo} := \frac{4 Ar \pi R^2 (9 R^4 Wi^2 + 9 R^4 Wr^2 + 2 Ar^2)}{k2^3}$$

> **intetrdet1:=factor(simplify(int(int((tre1\*detel)\*rho,theta=0..2\*Pi),rho=R..Rt))) assuming(R>0, Rt>R);**

$$\begin{aligned} \text{intetrdet1} := & -\pi (Rt - R) (R + Rt) (-6 Rt^2 R^4 kI^2 Nr Fi Mi - 6 Rt^2 R^4 kI^2 Nr Fr Mr \\ & - Rt^2 R^2 Fi Hr Mi kI^2 - Rt^2 R^2 Fr Hr Mr kI^2 + 6 Rt^8 R^6 kI^2 Nr Gi Qi + 6 Rt^8 R^6 kI^2 Nr Gr Qr \\ & - 3 Rt^6 R^6 Qi Gi Hr kI^2 + 36 Rt^6 R^6 Nr Fr Qr \mu1^2 - 3 Rt^6 R^6 Qr Gr Hr kI^2 \\ & - 36 Rt^6 R^6 Nr Fi Qi \mu1^2 + 6 Rt^6 R^8 kI^2 Nr Gi Qi + 6 Rt^6 R^8 kI^2 Nr Gr Qr \\ & - Rt^4 Fi Gi Hr kI^2 R^4 + Rt^4 Fr Gr Hr kI^2 R^4 + 9 Rt^4 Qr Hr Mr kI^2 R^4 - 9 Rt^4 Qi Hr Mi kI^2 R^4 \\ & - 6 Rt^4 kI^2 Nr Fi Mi R^2 - 6 Rt^4 kI^2 Nr Fr Mr R^2 + Nr Hr^2 kI^2 R^4 Rt^4 - R^4 Fi Hr Mi kI^2 \\ & - R^4 Fr Hr Mr kI^2 - 18 Rt^{10} R^6 Nr Qi^2 \mu1^2 - 18 Rt^{10} R^6 Nr Qr^2 \mu1^2 + 12 Rt^{10} R^6 Nr Qi^2 kI^2 \\ & + 12 Rt^{10} R^6 Nr Qr^2 kI^2 - 9 Rt^8 R^6 kI^2 Qr^2 Hr - 9 Rt^8 R^6 kI^2 Qi^2 Hr - 18 Rt^8 R^8 Nr Qi^2 \mu1^2 \\ & - 18 Rt^8 R^8 Nr Qr^2 \mu1^2 + 12 Rt^8 R^8 Nr Qi^2 kI^2 + 12 Rt^8 R^8 Nr Qr^2 kI^2 + Rt^6 R^6 Nr Gr^2 kI^2 \\ & + Rt^6 R^6 Nr Gi^2 kI^2 - 9 Rt^6 R^8 kI^2 Qr^2 Hr - 9 Rt^6 R^8 kI^2 Qi^2 Hr - 18 Rt^6 R^{10} Nr Qi^2 \mu1^2 \\ & - 18 Rt^6 R^{10} Nr Qr^2 \mu1^2 + 12 Rt^6 R^{10} Nr Qi^2 kI^2 + 12 Rt^6 R^{10} Nr Qr^2 kI^2 - 6 Rt^4 Nr Fi^2 \mu1^2 R^4 \\ & + 4 Rt^4 Nr Fr^2 kI^2 R^4 - 6 Rt^4 Nr Fr^2 \mu1^2 R^4 + 4 Rt^4 Nr Fi^2 kI^2 R^4 + Rt^4 kI^2 Fr^2 Hr R^2 \\ & + Rt^4 kI^2 Fi^2 Hr R^2 - Rt^4 Fi Hr Mi kI^2 - Rt^4 Fr Hr Mr kI^2 + 3 Rt^2 R^2 Nr Mr^2 kI^2 \\ & + 3 Rt^2 R^2 Nr Mi^2 kI^2 + Rt^2 R^4 kI^2 Fr^2 Hr + Rt^2 R^4 kI^2 Fi^2 Hr + 3 Rt^4 Nr Mi^2 kI^2 \\ & + 3 Rt^4 Nr Mr^2 kI^2 + 3 R^4 Nr Mi^2 kI^2 + 3 R^4 Nr Mr^2 kI^2 - 4 R^6 Nr^3 \mu1^2 Rt^6) / (2 R^6 kI^3 \mu1^2 \\ & Rt^6) \end{aligned}$$

> **intetrdet2:=factor(simplify(int(int((tre2\*dete2)\*rho,theta=0..2\*Pi),rho=0..R))) assuming(R>0, Rt>R);**

$$\begin{aligned} \text{intetrdet2} := & Ar \pi R^2 (-12 R^4 Wr^2 k2^2 - 12 R^4 k2^2 Wi^2 + 18 R^4 \mu2^2 Wi^2 + 18 R^4 \mu2^2 Wr^2 \\ & - 6 k2^2 R^2 Wr Br - 6 k2^2 R^2 Wi Bi + 4 \mu2^2 Ar^2 - Br^2 k2^2 - k2^2 Bi^2) / (2 k2^3 \mu2^2) \end{aligned}$$

> **ene:=simplify((1/2)\*(k1+mu1)\*intetrel-2\*mu1\*intededete1+(1/2)\*(k2+mu2)\*intetre2-2\*mu2\*intededete2):**

> **ene2:=simplify(3\*(e1+f1)\*intetrelcubo-6\*e1\*intetrdet1+3\*(e2+f2)\*intetre2cubo-6\*e2\*intetrdet2):**

> **c:=R^2/Rt^2;**

$$c := \frac{R^2}{Rt^2}$$

> **Ar:=(epsilon11+epsilon22)\*(chi1+1)/((2\*c+chi1-1)\*(chi2-1)/mu2+2\*(1-c)\*(chi1-1)/mu1):**

> **Nr:=(epsilon11+epsilon22)\*(mu1/mu2\*(chi2-1)+2)/((2\*c+chi1-1)\*(chi2-1)/mu2+2\*(1-c)\*(chi1-1)/mu1):**

> **Hr:=2\*c\*(epsilon11+epsilon22)\*(chi1-1-mu1/mu2\*(chi2-1))/((2\*c+chi1-1)\*(chi2-1)/mu2+2\*(1-c)\*(chi1-1)/mu1)\*Rt^2:**

> **alpha:=(chi1/mu1-chi2/mu2)-chi1\*(1/mu1+chi2/mu2)/c^3:**

> **beta:=(chi1/mu1+1/mu2)-chi1\*c\*(1/mu1-1/mu2):**

```

> provacmu:=(1/mu1-1/mu2)*mu1*(epsilon11-epsilon22+2*I*epsilon12)*
R^2/(-3*(1/mu1+chi2/mu2)*(1/mu1-1/mu2)*(1-1/c)^2/alpha-beta):
> Fr:=Re(provacmu) assuming
(mu1, real, mu2, real, k1, real, k2, real, epsilon11, real, epsilon22, real
, epsilon12, real, R, real, Rt, real):
> Fi:=Im(provacmu) assuming
(mu1, real, mu2, real, k1, real, k2, real, epsilon11, real, epsilon22, real
, epsilon12, real, R, real, Rt, real):
> provac3:=-conjugate(provacmu)*(1/mu1+chi2/mu2)*(1-1/c)/alpha/R^4
assuming
(mu1, real, mu2, real, k1, real, k2, real, epsilon11, real, epsilon22, real
, epsilon12, real, R, real, Rt, real):
> Qr:=Re(provac3) assuming
(mu1, real, mu2, real, k1, real, k2, real, epsilon11, real, epsilon22, real
, epsilon12, real, R, real, Rt, real):
> Qi:=Im(provac3) assuming
(mu1, real, mu2, real, k1, real, k2, real, epsilon11, real, epsilon22, real
, epsilon12, real, R, real, Rt, real):
> provadm3:=chi1*conjugate(provac3)*Rt^6+(provacmu)*Rt^2 assuming
(mu1, real, mu2, real, k1, real, k2, real, epsilon11, real, epsilon22, real
, epsilon12, real, R, real, Rt, real):
> Mr:=Re(provadm3) assuming
(mu1, real, mu2, real, k1, real, k2, real, epsilon11, real, epsilon22, real
, epsilon12, real, R, real, Rt, real):
> Mi:=Im(provadm3) assuming
(mu1, real, mu2, real, k1, real, k2, real, epsilon11, real, epsilon22, real
, epsilon12, real, R, real, Rt, real):
> provad1:=chi1*conjugate(provacmu)/Rt^2-3*(provac3)*Rt^2-mu1*(eps
ilon11-epsilon22-2*I*epsilon12) assuming
(mu1, real, mu2, real, k1, real, k2, real, epsilon11, real, epsilon22, real
, epsilon12, real, R, real, Rt, real):
> Gr:=Re(provad1) assuming
(mu1, real, mu2, real, k1, real, k2, real, epsilon11, real, epsilon22, real
, epsilon12, real, R, real, Rt, real):
> Gi:=Im(provad1) assuming
(mu1, real, mu2, real, k1, real, k2, real, epsilon11, real, epsilon22, real
, epsilon12, real, R, real, Rt, real):
> provaa3:=provac3*(1+chi1/c^3)-conjugate(provacmu)*(1-1/c)/R^4
assuming
(mu1, real, mu2, real, k1, real, k2, real, epsilon11, real, epsilon22, real
, epsilon12, real, R, real, Rt, real):
> Wr:=Re(provaa3) assuming
(mu1, real, mu2, real, k1, real, k2, real, epsilon11, real, epsilon22, real
, epsilon12, real, R, real, Rt, real):
> Wi:=Im(provaa3) assuming
(mu1, real, mu2, real, k1, real, k2, real, epsilon11, real, epsilon22, real

```

```

, epsilon12, real, R, real, Rt, real) :
> provab1:=conjugate(provacmu) * ((4-3/c)/R^2+chi1/Rt^2)-3*provac3*(
Rt^2+chi1*R^2/c^3)-mu1*(epsilon11-epsilon22-2*I*epsilon12)
assuming
(mu1, real, mu2, real, k1, real, k2, real, epsilon11, real, epsilon22, real
, epsilon12, real, R, real, Rt, real) :
> Br:=Re(provab1) assuming
(mu1, real, mu2, real, k1, real, k2, real, epsilon11, real, epsilon22, real
, epsilon12, real, R, real, Rt, real) :
> Bi:=Im(provab1) assuming
(mu1, real, mu2, real, k1, real, k2, real, epsilon11, real, epsilon22, real
, epsilon12, real, R, real, Rt, real) :

```

```

> kk1:=10;kk2:=30;mumu1:=15;mumu2:=20;ee1:=1;ee2:=3;ff1:=4;ff2:=2;
kk1 := 10
kk2 := 30
mumu1 := 15
mumu2 := 20
ee1 := 1
ee2 := 3
ff1 := 4
ff2 := 2

```

```

> ene12:=factor(simplify(subs(epsilon11=0, epsilon22=0, epsilon12=1,
k1=kk1, mu1=mumu1, k2=kk2, mu2=mumu2, R=p^(1/2), Rt=1, ene))) :
> ene11:=factor(simplify(subs(epsilon11=1, epsilon22=0, epsilon12=0,
k1=kk1, mu1=mumu1, k2=kk2, mu2=mumu2, R=p^(1/2), Rt=1, ene))) :
> mueff:=factor(simplify(ene12/(2*Pi)));keff:=factor(simplify(2*en
e11/(Pi)-mueff));

```

$$mueff := -\frac{15(9p^4 + 204p^3 - 66p^2 - 11p - 836)}{-204p^3 + 66p^2 - 209p + 836 + 36p^4}$$

$$keff := -\frac{30(2p + 3)}{4p - 9}$$

```

> enex:=factor(simplify(subs(epsilon11=1, epsilon22=0, epsilon12=0, k
1=kk1, mu1=mumu1, k2=kk2, mu2=mumu2, e1=ee1, e2=ee2, f1=ff1, f2=ff2, R=p
^(1/2), Rt=1, ene2/Pi/3))) :
> eney:=factor(simplify(subs(epsilon11=1, epsilon22=1, epsilon12=0, k
1=kk1, mu1=mumu1, k2=kk2, mu2=mumu2, e1=ee1, e2=ee2, f1=ff1, f2=ff2, R=p
^(1/2), Rt=1, ene2/Pi/12))) :
> feff:=factor(simplify(eney-enex));eeff:=factor(simplify(2*enex-e
ney));

```

$$feff := -(-1278911715 p^5 + 495543414 p^6 - 11802609104 p - 4426937438 p^3 + 3883438185 p^4 + 5456854249 p^2 + 8151922944 + 2957400 p^9 + 3189456 p^{10} - 184829364 p^7 - 24993027 p^8) / (4(-204 p^3 + 66 p^2 - 209 p + 836 + 36 p^4)^2 (4 p - 9)^3)$$



$$e_{eff} := \frac{3 (74223 p^8 + 606756 p^7 - 1633830 p^6 + 196071 p^5 - 1992485 p^4 + 7256282 p^3 - 1521091 p^2 - 1548800 p - 4193376) / (2 (4 p - 9) (-204 p^3 + 66 p^2 - 209 p + 836 + 36 p^4)^2)}$$

```
> plot ({mueff, keff}, p=0..1);
```

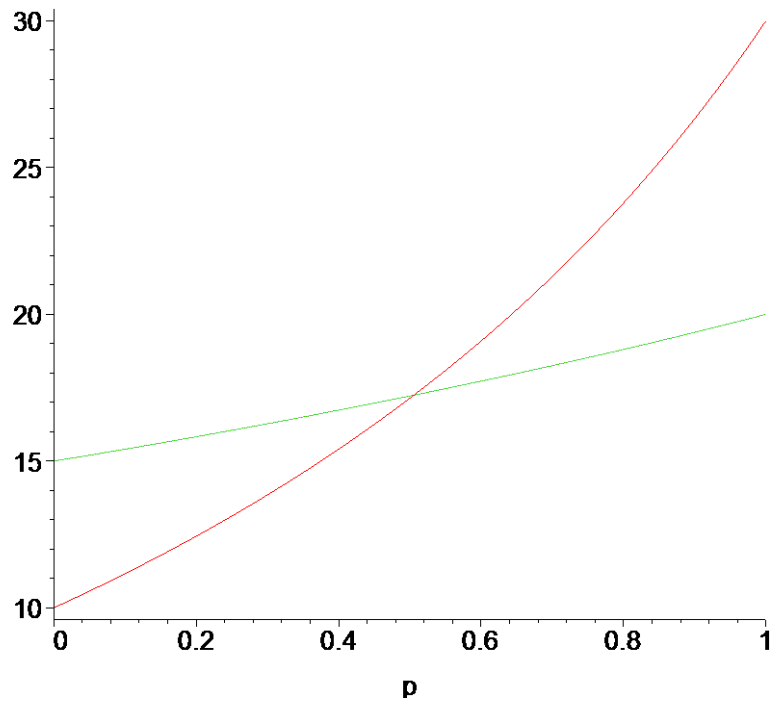

```
> plot ({e_eff, f_eff}, p=0..1);
```

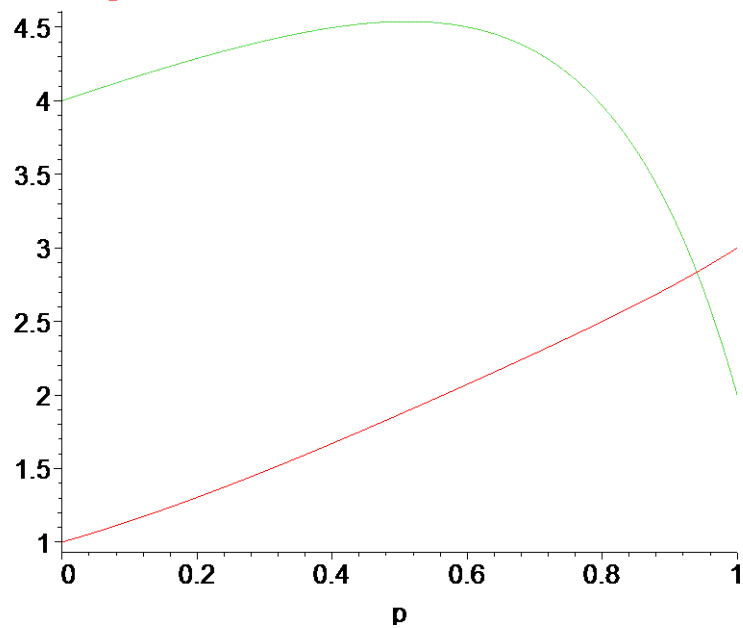

Supplement: mmc1 [file mmc1.pdf]
